# Supplementary material for: The Prognostic Model Based on Tumor Cell Evolution Trajectory Reveals a Different Risk Group of Hepatocellular Carcinoma
Source: Frontiers journal article supplement (doi:10.3389/fcell.2021.737723), 2021-09-29
Supplement: Data_Sheet_3.PDF [file Data_Sheet_3.PDF]

Supplement Table 3 : Datasets review

| Data set                            | GEO Accession    | scRNA-seq Method                                                          | Total cell number                      | Tissues                            | Information                                                         |
|-------------------------------------|------------------|---------------------------------------------------------------------------|----------------------------------------|------------------------------------|---------------------------------------------------------------------|
| Bojan L et al.(2020),<br>Nat Commun | GSE112271        | 3' sequencing and barcoding<br>(10x Genomics)                             | 38553                                  | HCC                                | 2 donors                                                            |
| Ankur S et al.(2020),<br>Cell       | GSE156337        | 3' sequencing and barcoding<br>(10x Genomics)                             | 73,589                                 | HCC&adjacent                       | 12398 tumor cells from 14 donors (mean<br>number of Features = 659) |
| Zhang et al.(2019),<br>Cell         | HRA000069        | 3' sequencing and barcoding<br>(10x Genomics)/Full length<br>(SMART-seq2) | 66,187 (10x)<br>11,134(SMART-<br>seq2) | HCC/adjacent/LNs/bl<br>ood/ascites | High quality CD45+ Immune cells                                     |
| Ma et al., (2019)<br>Cancer Cell    | GSE125449        | 3' sequencing and barcoding<br>(10x Genomics)                             | 5, 115                                 | HCC                                | 702 tumor cells from 8 tumors                                       |
| Sun et al. (2020)<br>cell           | CNSA: CNP0000650 | Full length (SMART-seq2)                                                  | 17, 000                                | HCC                                | 2737 tumor cells from 18 donors (mean<br>number of Features = 7540) |
